# Supplementary material for: A novel anti-tumor/anti-tumor-associated fibroblast/anti-mPEG tri-specific antibody to maximize the efficacy of mPEGylated nanomedicines against fibroblast-rich solid tumor
Source: Royal Society of Chemistry journal article supplement (doi:10.1039/d1bm01218e), 2021-11-16
Supplement: d1bm01218e1.pdf [file d1bm01218e1.pdf]

## Supplemental Tables

**Table S1. Anti-mPEG affinities of TsAb and BsAbs**

| <b>Antibodies</b>                 | <b>EC50 (nM) <sup>a)</sup></b> |
|-----------------------------------|--------------------------------|
| anti-HER2/anti-mPEG BsAb          | 3.505                          |
| anti-FAP/anti-mPEG BsAb           | 3.581                          |
| anti-HER2/anti-FAP/anti-mPEG TsAb | 3.687                          |

<sup>a)</sup> EC50 was determined by the value from anti-mPEG ELISA. Methoxyl-PEG5000-NH<sub>2</sub>-coating ELISA plate was stained with serially diluted TsAb and BsAbs. The bound TsAb and BsAbs were further detected with HRP-conjugated goat anti-human IgG F(ab')<sub>2</sub> and ABTS substrate.

**Table S2. IC<sub>50</sub> (μg/mL) of TsAb- or BsAb-Lipo-Dox against co-culture of MCF-7/HER2 and WS-1/FAP.**

| Nanomedicines <sup>a)</sup> | Ratios of MCF-7/HER2 to WS-1/FAP <sup>b)</sup> |                    |        |
|-----------------------------|------------------------------------------------|--------------------|--------|
|                             | 1:0.2                                          | 1:1                | 1:5    |
| Lipo-Dox                    | >100 <sup>c)</sup>                             | >100 <sup>c)</sup> | 48.806 |
| anti-HER2-Lipo-Dox          | 39.231                                         | 29.928             | 70.991 |
| anti-FAP-Lipo-Dox           | >100 <sup>c)</sup>                             | 37.912             | 20.352 |
| anti-HER2/anti-FAP-Lipo-Dox | 39.688                                         | 16.845             | 24.021 |

<sup>a)</sup> Nanomedicines were prepared by mixing Lipo-Dox with buffer (PBS + 0.05 BSA), anti-HER2/anti-mPEG BsAb, anti-FAP/anti-mPEG BsAb, anti-HER2/anti-FAP/anti-mPEG TsAb.

<sup>b)</sup> MCF-7/HER2 cells and WS-1/FAP cells were mixed with at the indicated cell ratios (1:0.2, 1:1, and 1:5), seeded into 96-well plates (4000 cells per well), and then treated with the serially diluted nanomedicines.

<sup>c)</sup> Values of > 100 μg/mL indicate the IC<sub>50</sub> value is greater than the maximum concentration.

**Table S3. Tumor size of SCID mice bearing with TAF-rich breast tumor at week 6.**

| <b>Nanomedicines <sup>a)</sup></b> | <b>Tumor size (mm<sup>3</sup>) <sup>b)</sup></b> | <b><i>P</i> value <sup>c)</sup></b> |
|------------------------------------|--------------------------------------------------|-------------------------------------|
| Vehicle                            | 879.2 ± 155.0                                    |                                     |
| Lipo-Dox                           | 456.1 ± 174.1                                    |                                     |
| anti-HER2-Lipo-Dox                 | 353.0 ± 54.6                                     | 0.3092                              |
| anti-FAP-Lipo-Dox                  | 362.1 ± 81.3                                     | 0.3777                              |
| anti-HER2/anti-FAP-Lipo-Dox        | 211.6 ± 63.4                                     | 0.0054                              |

<sup>a)</sup> Nanomedicines were prepared by mixing Lipo-Dox with buffer (PBS + 0.05% BSA), anti-HER2/anti-mPEG BsAb, anti-FAP/anti-mPEG BsAb, anti-HER2/anti-FAP/anti-mPEG TsAb, and then were weekly i.v. injected for 5 times.

<sup>b)</sup> mean ± SD, n = 5.

<sup>c)</sup> *P* value when compared with the Lipo-Dox treatment group.

**Table S4. Tumor size of SCID mice bearing with TAF-free breast tumor at week 6.**

| <b>Nanomedicines <sup>a)</sup></b> | <b>Tumor size (mm<sup>3</sup>) <sup>b)</sup></b> | <b><i>P</i> value <sup>c)</sup></b> |
|------------------------------------|--------------------------------------------------|-------------------------------------|
| Vehicle                            | 924.3±124.5                                      |                                     |
| Lipo-Dox                           | 485.7±111.2                                      |                                     |
| anti-HER2-Lipo-Dox                 | 296.4±26.7                                       | 0.2581                              |
| anti-FAP-Lipo-Dox                  | 520.8±143.7                                      | 0.6277                              |
| anti-HER2/anti-FAP-Lipo-Dox        | 293.2±75.7                                       | 0.7125                              |

<sup>a)</sup> Nanomedicines were prepared by mixing Lipo-Dox with buffer (PBS + 0.05% BSA), anti-HER2/anti-mPEG BsAb, anti-FAP/anti-mPEG BsAb, anti-HER2/anti-FAP/anti-mPEG TsAb, and then were weekly i.v. injected for 5 times.

<sup>b)</sup> mean ± SD, n = 5.

<sup>c)</sup> *P* value when compared with the Lipo-Dox treatment group.

Supplemental Figures

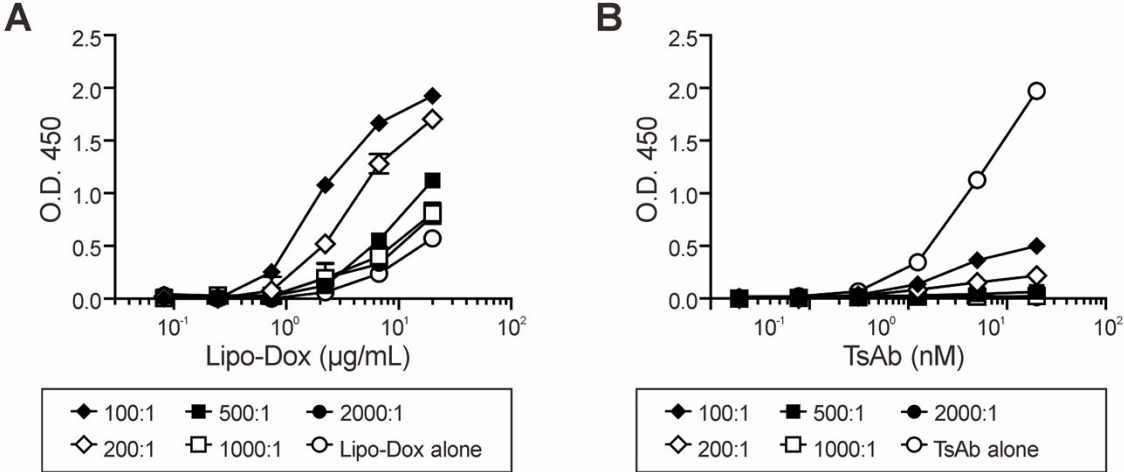

**Figure S1. Determination of optimal TsAb modification ratio.** (A) The cellular binding of TsAb-Lipo-Dox prepared with various mPEG:TsAb ratios was assessed by cell-based ELISA with MCF-7/HER2 cells. (n = 3. Bar, SD.) (B) The amount of free TsAb in TsAb-Lipo-Dox solution was assessed by ELISA with mPEG-coated plates. All TsAb-Lipo-Dox solution was diluted to the same molar concentration of TsAb. (n = 3. Bar, SD.)

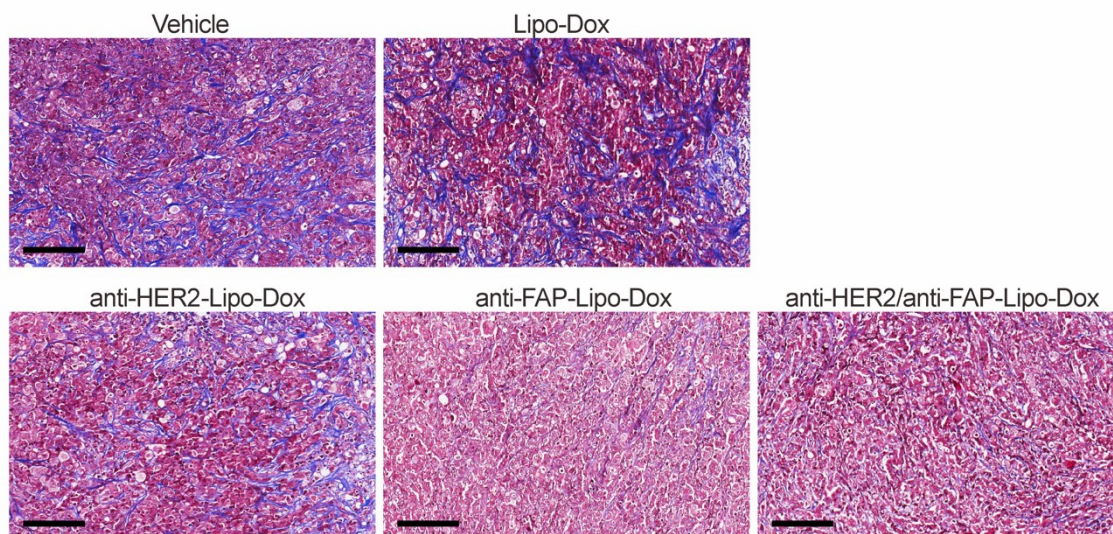

**Figure S2. Masson's trichrome staining of treated TAF-rich tumors.** Tumors were excised 2 weeks after the last dose of vehicle (PBS+0.05% BSA) or nanomedicines, and then were fixed in 10% formalin and embedded in paraffin. The tissue sections were cut at 4  $\mu\text{m}$ , and stained with Masson's trichrome. Blue, collagen; dark purple, nuclei; and light pink, cytoplasm. Scale bar, 200  $\mu\text{m}$ .

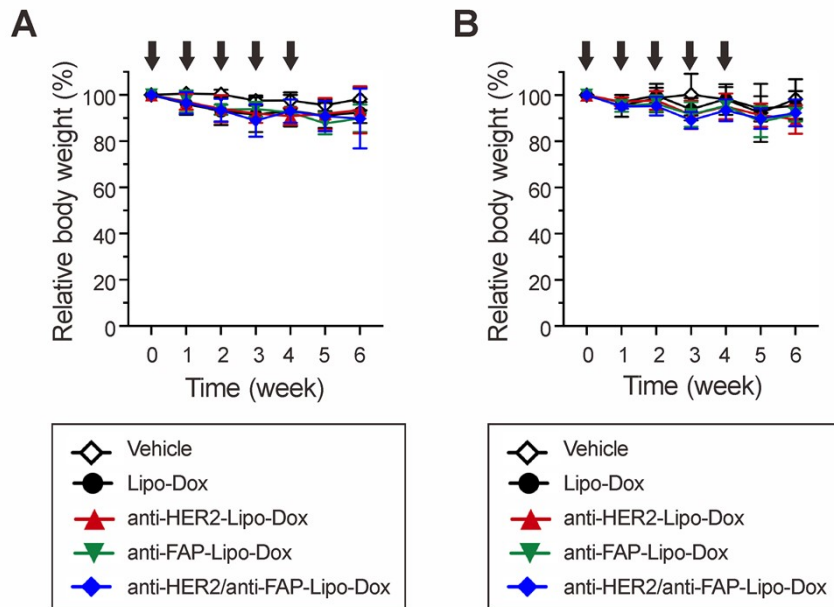

**Figure S3. Relative body weights of SCID mice receiving treatment with the nanomedicines.** Body weights of mice bearing **(A)** s.c. tumors consisting of a mixture of MCF-7/HER2 cells and WS-1/FAP cells or **(B)** s.c. tumors consisting of MCF-7/HER2 cells alone were measured weekly. Arrows indicate the time points of the administration. (n = 5. Bar, SD.)

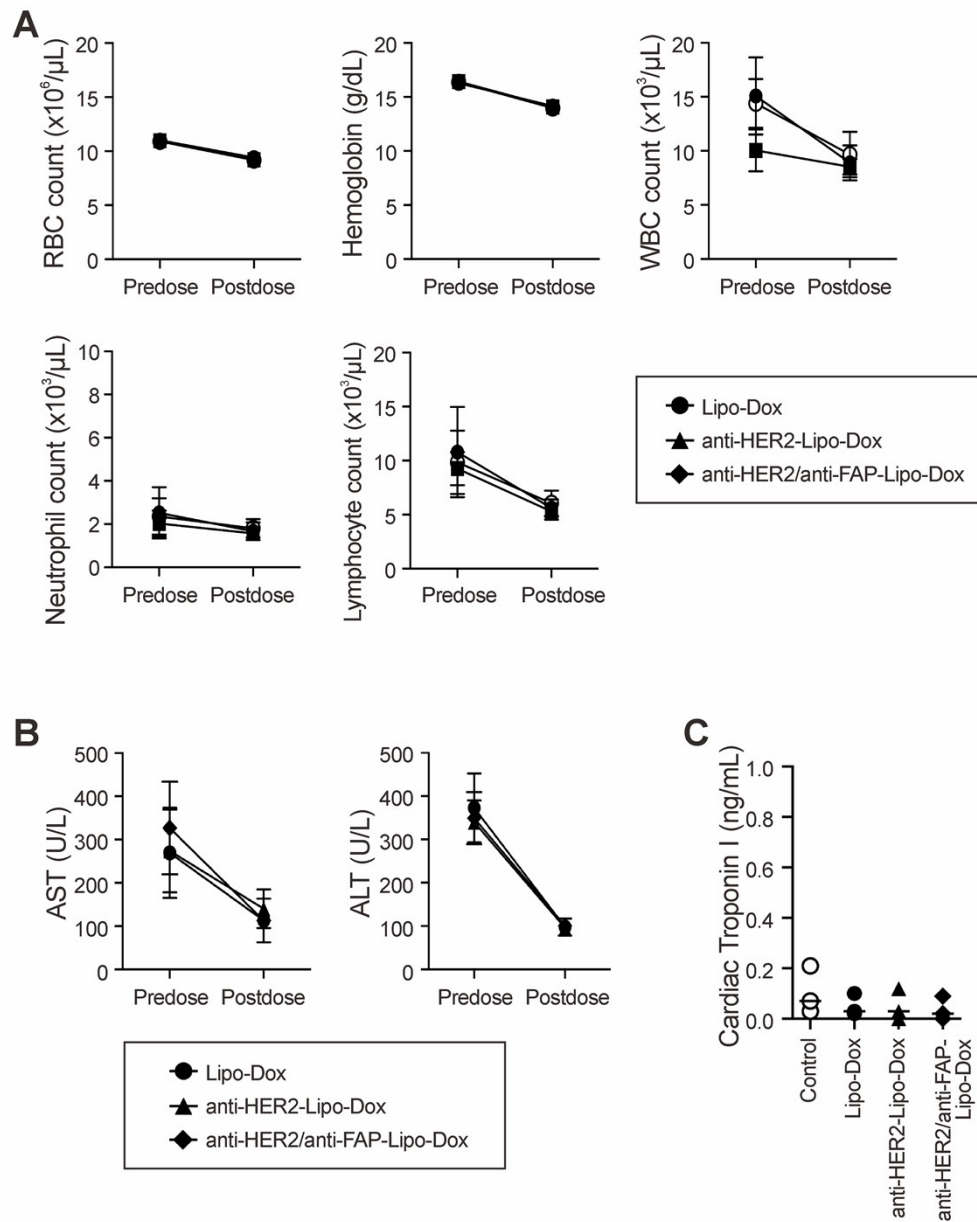

**Figure S4. Side effect evaluations of TsAb- and BsAb-Lipo-Dox.** BALB/c mice received three doses of the nanomedicines, and then blood was collected from their sublingual veins to measure **(A)** RBC, hemoglobin, WBC, neutrophil, and lymphocyte levels for myelotoxicity (n = 5. Bar, SD.), **(B)** AST and ALT levels for liver toxicity (n = 5. Bar, SD.), and **(C)** troponin I levels for cardiac toxicity (n = 3. Bar, SD.).
